# Supplementary material for: A compact phage display human scFv library for selection of antibodies to a wide variety of antigens
Source: PubMed Central journal article supplement (PMC2642811; doi:10.1186/1472-6750-9-6), 2009-01-29
Supplement: 1472-6750-9-6-S1.pdf [file 1472-6750-9-6-S1.pdf]

## Amino acids Sequences of ten random clones from unselected library

| Clone     | FR1                                 | CDR1                  | FR2                  | CDR2                   | FR3                                    | CDR3                    | Germline                | Amino acid different from germline | Family |
|-----------|-------------------------------------|-----------------------|----------------------|------------------------|----------------------------------------|-------------------------|-------------------------|------------------------------------|--------|
| <b>VH</b> |                                     |                       |                      |                        |                                        |                         |                         |                                    |        |
| 1         | QVQLQQSGPGLLKPSQTL<br>SLTCAISGDSVS  | SKGPAWN               | WIRQSPSRGLEWLG       | RTYYWSGWRHDYAP<br>SLQS | RITINPDTSKNQFSLQLNSVTP<br>DDTAVYYCAK   | GRDSGFDI                | IGHV6-1*01<br>(DP74)    | 12                                 | VH3    |
| 2         | VQLVESGGGLVKGPGESLR<br>LSCEASGFA FS | SYNMN                 | WLRQAPGKGLEWVS       | SMSPSGRDIFYPES<br>LKG  | RFTASRDNARNLSLYQMNSLRV<br>EDTAMYYCVR   | STLLEIAGKSPGLD<br>M     | IGHV3-21*01<br>(DP77)   | 20                                 | VH3    |
| 3         | QVNLRESGPTQVKPTQAL<br>TLTCTVSGVLSLS | TSGVGVG               | WLRQAPGKGLEWL<br>A   | LLYWDDDDRYNPSL<br>KT   | RLAITRGSSRDQVVLTVTNVDP<br>SDTGTGYFCAH  | RRSGLLVFGIRDAF<br>DI    | IGHV2-5*09<br>(S12-2)   | 24                                 | VH2    |
| 4         | VQLQQSGAEVKKPGSSVK<br>VSCKASGGTFS   | SYAIS                 | WVRQAPGQGLEWVG       | GIIPIFGTANYAQK<br>FQG  | RVTITADESTSTAYMELSSLRS<br>EDTAVYYCAR   | VRDTAMEFFDY             | IGHV1-69*12<br>(DP10)   | 2                                  | VH1    |
| 5         | QVQLQQSGPGLVKPSETL<br>SLTCIVSGGSIT  | SYSWS                 | WTRQAPGQGLEWIG       | RIYNGGSTNYNPSL<br>KS   | RVTMSLDTSKNQFSLRLSSVTA<br>ADTAVYYCAR   | GPYGTGSQCHVFDP          | IGHV4-4*07<br>(VIV4)    | 2                                  | VH4    |
| 6         | QVQMQESGAGLLNPLETL<br>SLTCTVYGGSVS  | NHYYYS                | RIRQPPGKQGEWFA       | YIHYTETNYNPSL<br>KS    | RVTISVDTSKNQFSLRLSSVTA<br>ADTAVYYCAR   | VDILSGMRHF              | IGHV4-61*08<br>(DP66)   | 19                                 | VH4    |
| 7         | EVQLVESGAEVRRPGESL<br>TISCRGSGDTFP  | KHWIA                 | WVRQMPGKGLEWLG       | RLDPSDSYTNYNPS<br>FQG  | HVSISADQSIISTVYLQWSSPKA<br>SDTALYYCAR  | LTCRTTSCYTDNWS<br>DA    | IGHV5-a*01<br>(VH32)    | 17                                 | VH5    |
| 8         | QVQLQQSGPGLVKPSQTL<br>SLTCAISGDSVS  | SNSAAWN               | WIRQSPSRGLEWLG       | RTYYRSKWyNEVAL<br>SVKS | RLTINPDTSKNQFSLILNSVTP<br>EDSAVYYCAT   | WRFDY                   | IGHV6-1*01<br>(DP74)    | 5                                  | VH6    |
| 9         | EVQLVESGGGLVQPGGSL<br>RLSCAASGFTFS  | SYEMN                 | WVRQAPGKGLEWVS       | YISSSGSTIYYADS<br>VKG  | RFTISRDNAKNSLYQMNSLRA<br>EDTAVYYCAR    | VSLDTAGDAFDI            | IGHV3-48*03<br>(DP58)   | 0                                  | VH3    |
| 10        | VQLVQSGGGLVQPGGSLR<br>LSCAASGFTFS   | SYAMS                 | WVRQAPGKGLEWVS       | AISGSGGSTYYADS<br>VKG  | RFTISRDNKNTLYQMNSLRA<br>EDTAVYYCAK     | DNTEMVRGVMLYYY<br>YYMDV | IGHV3-23*04<br>(DP47)   | 1                                  | VH3    |
| <b>VL</b> |                                     |                       |                      |                        |                                        |                         |                         |                                    |        |
| 1         | DIQMTQSPDLSAVSLGER<br>ATINC         | KSSQSVLFSS<br>NNKHHLA | WYQQKRGRLPPKLLI<br>F | WASTRES                | GVPDRFSGSGSGTDFTLTISL<br>QAEDVAVYYC    | QQYQSIPHT               | IGKV4-1*01<br>(DPK24)   | 9                                  | VK4    |
| 2         | SSELTQDPAVVALGQTV<br>RITC           | QGDSLRTYYA<br>S       | WYQQKPGQAPVLVI<br>Y  | GKNRNP                 | GIPDRFSGSSGNTASLTITGA<br>QAEDVAVYYC    | NSRSDSDNHVV             | IGLV3-19*01<br>(DPL16)  | 2                                  | VL3    |
| 3         | EIVLTQSPGTVSLSPGQR<br>VTLSC         | RASQSVRGSF<br>FA      | WYQQKPGQAPRLL<br>IH  | GASSRAT                | GIPDRFDGSGSGTDFTLSISRL<br>ETEDFVAVYYC  | QQYGTSPYT               | IGKV3-20*01<br>(DPK22)  | 12                                 | VK3    |
| 4         | QSALTQPASASGSPGQSV<br>TISC          | TGTISDIGAH<br>DLVS    | WYQQPPGKAPKLLI<br>F  | EVSKRAS                | GVPDRFSGSKSGNAASLTISGL<br>QADDEADYFC   | CSSTNKNNFAVE            | IGLV2-8*01<br>(V1-2)    | 19                                 | VL2    |
| 5         | QAVLTQPSLSASPGSSA<br>SLTC           | TLRSDFDVRS<br>YRIY    | WYQQKPGSPPQYLL<br>R  | FKSDSEKHRGS            | GVPDRFSGSKDASANAGILLIS<br>GLQFDEADYFC  | MIYYNMASE               | IGLV5-45*03<br>(V4-2)   | 16                                 | VL5    |
| 6         | EIVLTQSPPLYLPVTPGEP<br>ASISC        | RSSQSLLSN<br>GNYLD    | WYVQKPGQSPQLLI<br>Y  | LGSNRAS                | GVPDRFSGSGSGTDFTLEISRV<br>EAEDVGVYYC   | MQALQTPK                | IGKV2D-28*01<br>(DPK15) | 5                                  | VK2    |
| 7         | QAVLTQPSLSASPGASA<br>SLTC           | TLRSGIDVAA<br>YRIY    | WYQQKPGSPPQYLL<br>R  | YKSDSDKQQGS            | GVPDRFSGSKDASANAGILLIS<br>GLQSQDEADYFC | AIWHNSAWV               | IGLV5-45*03<br>(V4-2)   | 6                                  | VL5    |
| 8         | LTQPPSVSVSAGQTVSIT<br>C             | SGENLQKIYV<br>S       | WYQQKPGQSPILVI<br>Y  | KDNKRPS                | GIPERFSGSNGNTATLTVSGA<br>LAADAEAYFC    | QTWDIDTAL               | IGLV3-1*01<br>(DPL23)   | 23                                 | VL3    |
| 9         | SSELTQDPAVVALGQTV<br>TITC           | QGESLRNYFA<br>S       | WYQQKPGQAPILVM<br>Y  | DEDIRPS                | GIPDRFSGSSSEKTASLTITGV<br>QAEDVAVYYC   | KCRGSGGDHLEIL           | IGLV3-19*01<br>(DPL16)  | 19                                 | VL3    |
| 10        | NFMLTQPHSVSESPGKTV<br>TISC          | TRSSGFIDTN<br>YVQ     | WYQQRPGSAPTPI<br>Y   | ESKQRPS                | GVPVRFSGSVDISSNSASLTIS<br>GLETEDEADYFC | QSFDSNKLTV              | IGLV6-57*01<br>(V1-22)  | 13                                 | VL6    |

\* Analysis of germ line family was done by using Ig BLAST [36], and DNA Plot program [34] (shown in parenthesis).
